# Supplementary material for: Eicosapentaenoic Acid Supplementation Changes Fatty Acid Composition and Corrects Endothelial Dysfunction in Hyperlipidemic Patients
Source: Hindawi journal article supplement (doi:10.1155/2012/754181), 2012-01-01
Supplement: f1 [file 754181.f1.pdf]

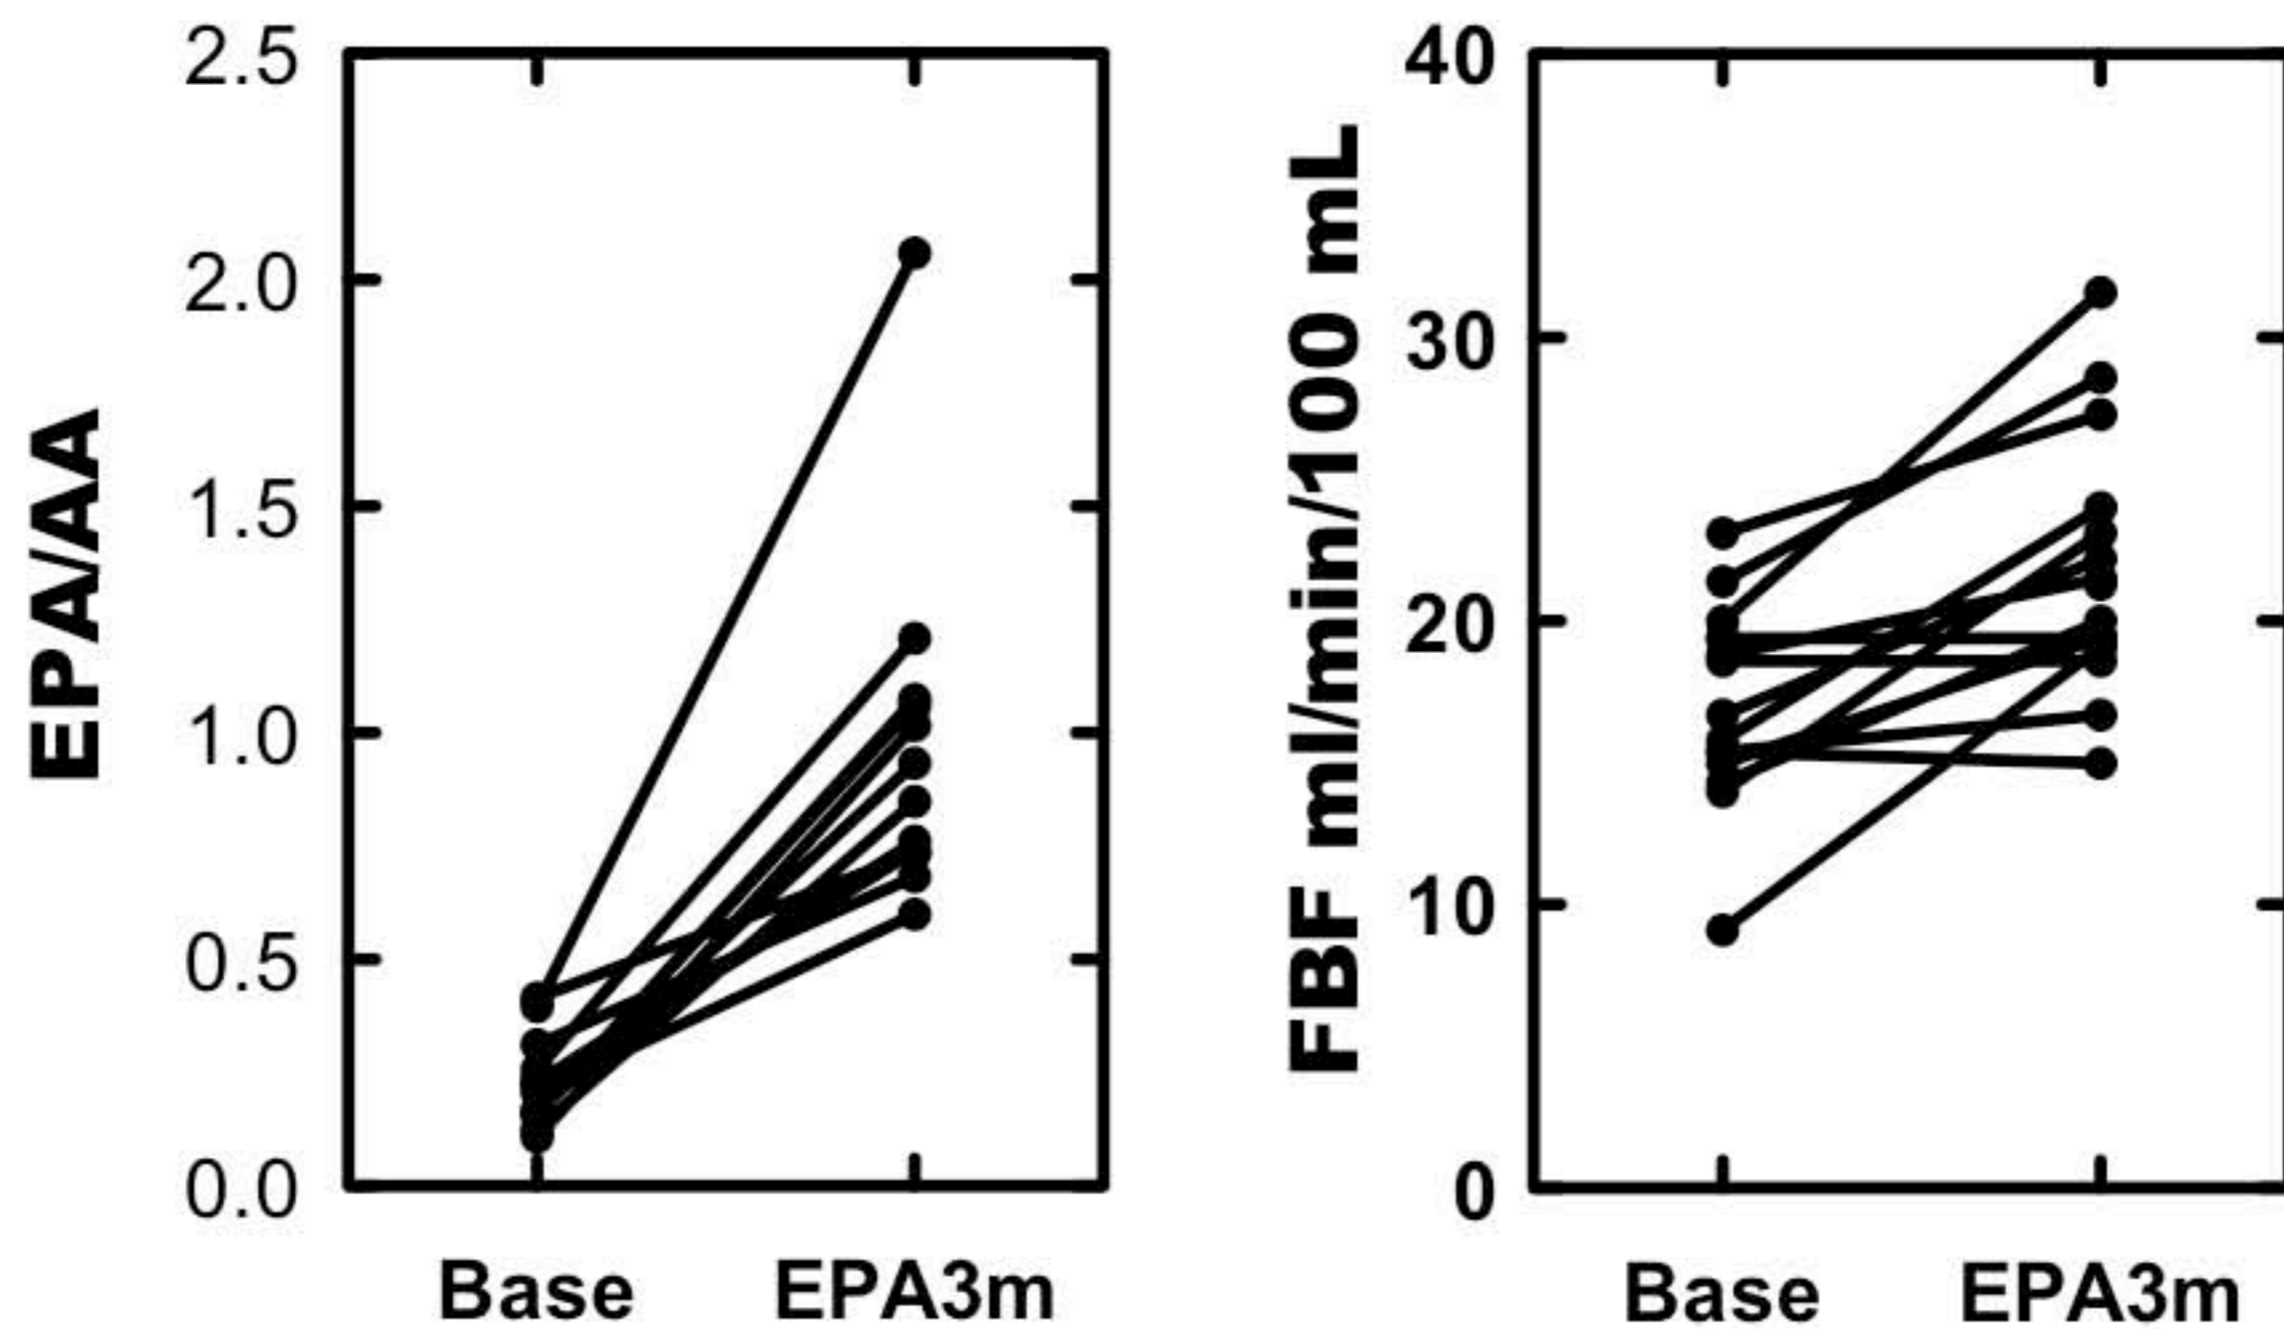

**Supplementary Fig.** Ratio of eicosapentaenoic acid to arachidonic acid (EPA/AA) (**left panel**) and peak forearm blood flow during reactive hyperemia (**right panel**) at baseline and at 3 months after EPA supplementation in hyperlipidemic subjects (n = 16)
